# Supplementary material for: A Pilot Study: The Reduction in Fecal Acetate in Obese Patients after Probiotic Administration and Percutaneous Electrical Neurostimulation
Source: MDPI journal article supplement (doi:10.3390/nu15051067), 2023-02-21
Supplement: s1 [file s1]

**A**

| Time (min) | H2O + 0.01% FA | ACN + 0.01% FA |
|------------|----------------|----------------|
| 0          | 80%            | 20%            |
| 2          | 80%            | 20%            |
| 7          | 60%            | 40%            |
| 7.5        | 0%             | 100%           |
| 8          | 0%             | 100%           |
| 11         | 80%            | 20%            |

**B**

| Metabolite | Q1 (m/z) | Q3 (m/z)      | Collision energy (V) |
|------------|----------|---------------|----------------------|
| Acetate    | 194.0    | 152.10/137.05 | 18/21                |
| Propionate | 208.2    | 137.05/165.15 | 20/15                |
| Butirate   | 222.1    | 137.00/152.05 | 20/16                |

**Supplementary Table S1.**
